---

| <b>Neuron</b> | <b>Degree, <math>k</math></b> | <b>Description</b>                                    |
|---------------|-------------------------------|-------------------------------------------------------|
| AVAR          | 137                           | Head command interneuron, role in locomotor decisions |
| AVAL          | 134                           | Head command interneuron, role in locomotor decisions |
| AVBR          | 104                           | Head command interneuron, role in locomotor decisions |
| AVBL          | 102                           | Head command interneuron, role in locomotor decisions |
| PVCR          | 69                            | Tail command interneuron, role in locomotor decisions |
| PVCL          | 64                            | Tail command interneuron, role in locomotor decisions |
| AVDR          | 63                            | Head command interneuron, role in locomotor decisions |
| AVER          | 63                            | Head command interneuron, role in locomotor decisions |
| AVEL          | 62                            | Head command interneuron, role in locomotor decisions |
| DVA           | 59                            | Tail interneuron, mechanosensory integration          |
| RIBL          | 56                            | Head interneuron                                      |
| AVKL          | 53                            | Head interneuron                                      |
| AVDL          | 52                            | Head command interneuron, role in locomotor decisions |
| RIBR          | 52                            | Head interneuron                                      |
| AIBR          | 49                            | Head interneuron                                      |
| RIGL          | 49                            | Head interneuron                                      |

---
